1 *Manuscript for Journal of Experimental Biology*

2 **Characterization of aquaporin1b (AQP1b) mRNA in mud loach (*Misgurnus mizolepis*)**  
3 **in response to heavy metal and immunostimulant stimuli**

4 **Running title:** Characterization of mud loach AQP1b

5

6 Sang Yoon Lee<sup>a</sup>, Yoon Kwon Nam<sup>b</sup>, Yi Kyung Kim<sup>a,c\*</sup>

7

8 <sup>a</sup>East Coast Life Science Institute, Gangneung-Wonju National University

9 <sup>b</sup>Department of Marine Bio-Materials and Aquaculture, Pukyong National University

10 <sup>c</sup>Department of Marine Biotechnology, Gangneung-Wonju National University

11

12 \*Author for correspondence:

13 Yi Kyung Kim

14 Department of Marine Biotechnology

15 Gangneung-Wonju National University

16 Gangneung 25457, Korea

17 E-mail: yikyung1118@gwnu.ac.kr

18 Tel.: +82-33-640-2409

19 Fax: +82-33-640-2955

20

21 **Abstract**

22 Aquaporins (AQPs) facilitate the transport of water or other small solutes into cells in the  
23 presence of osmotic gradients. However, the current understanding of piscine AQP gene with  
24 cellular stress responses has been still limitedly exemplified. In present study, we  
25 characterized the mud loach AQP1b gene at the nucleotide and amino acid levels. We  
26 identified three AQP 1b transcript variants (mmAQP1b\_tv1, mmAQP1b\_tv2, and  
27 mmAQP1b\_tv3). Then, we examined the AQP1b promoter region and observed several  
28 transcription factor binding sites (TFBS) for nuclear factor of activated T-cells (NFAT),  
29 SRY-box, c-AMP responsive element binding protein (CREB), GATA binding factor, and  
30 hepatic nuclear factor-1. Interestingly, mmAQP1b transcription was differentially modulated  
31 by heavy metal or immunostimulant challenge. Further studies to deepen the knowledge of  
32 fish AQP-mediated adaptation response potentially relevant to molecular pathogenesis are  
33 warranted.

34 **Key words:** Aquaporin, heavy metal, immunostimulant, stress, osmoregulation

35 **Summary statement:**

36 We identified mud loach AQP1b transcript variants and consensus sequences involved in  
37 stress or innate immunity in promotor region. AQP1b transcription was differentially  
38 modulated by heavy metal or immunostimulant challenge.

39

## 40 **Introduction**

41 Teleost species have the remarkable ability to withstand acute or long-term fluctuations in  
42 environmental salinity. Fish cells monitor the osmolality difference between the intracellular  
43 and extracellular spaces, and transport water to recover their volume following cell swelling  
44 or shrinkage. Salinity stress is linked to a wide range of biological processes *e.g.* metabolism,  
45 mortality, growth, and even immune responses (Baltzegar et al., 2014; Moshtaghi et al.,  
46 2016). After being subjected to an imbalance between environments, proteins trigger various  
47 complex responses such as changes in structure or function, a consequence of which is  
48 altered enzyme activity (Fiol and Kültz, 2007).

49 Aquaporins (AQPs) facilitate the transport of water or other small solutes into and out of cells  
50 in the presence of osmotic gradients. These integral membrane proteins have been identified  
51 across phyla, from Archaea (Kozono et al., 2003) to primates (King et al., 2004). Based on  
52 amino acid sequence similarity, 13 different AQPs (AQPs 0-12) can be divided into three  
53 subfamilies: classical aquaporins that selectively transport water; aquaglyceroporin that  
54 transport glycerol and other small molecules in addition to water; and an unorthodox

55 subgroup (Zardoya, 2005; Ishibashi et al., 2011). Genomic and phylogenetic analyses  
56 revealed that teleosts possess several AQP isoforms which have undergone lineage-specific  
57 changes and divergence via whole-genome duplication events (Tingaud-Sequeira et al., 2010).  
58 Zebrafish (*Danio rerio*) shows a much higher diversity of AQPs than tetrapod AQPs.  
59 Duplicated or triplicated sub-isoforms have been retained in the zebrafish genome (Tingaud-  
60 Sequeira et al., 2010; Finn and Cerdà, 2011; Finn et al., 2014; Madsen et al., 2015). The  
61 valuable information regarding the entire aquaporin sequence in water fleas (*Daphnia pulex*)  
62 have been recently published in the NCBI non-redundant protein database (Lind et al., 2017).  
63 Many studies indicate that AQPs show multiple modes of activation and regulation, enabling  
64 them to respond to diverse cellular events such as neutral signal transduction, brain swelling,  
65 and cellular migration (Balzegar et al., 2014; Moshtaghi et al. 2016). To date, understanding  
66 the physiological role of piscine AQPs has been facilitated by studying the expression of  
67 AQPs in response to changes in salinity (Cutler and Cramb, 2002; Watanabe et al., 2005;  
68 Giffard-Mena et al., 2011; Kim et al., 2010; Choi et al., 2013; Madsen et al., 2015).  
69 Mud loaches (*Misgurnus mizolepis*; Teleostei; Cypriniformes) are currently the most popular  
70 freshwater species with growing importance of domestic market in Korea. In addition to its  
71 commercial importance, the mud loach has attractive merits as an experimental organism,  
72 including small adult size, high fecundity, year-round spawning under controlled conditions,  
73 and relatively well-established techniques for genetic manipulation (Nam et al., 2011; Cho et

74 [al., 2012](#)). Given these advantages, mud loaches could be particularly relevant for studying  
75 the involvement of aquaporins in physiological processes.

76 Most studies investigating piscine aquaporin genes focus on the effects of salinity-induced  
77 adaptation in piscine AQP genes in response to biological challenges. However, investigating  
78 the interaction among genes using molecular genetic approaches has elucidated the molecular  
79 mechanisms underlying biological function and regulatory gene expression. Identifying  
80 interaction among diverse genes and autonomous adaptation effects are essential for  
81 systematically unraveling the cellular or molecular mechanisms of AQP action. Recent  
82 reports indicate that AQPs could be involved in inflammasome activation-induced cell  
83 volume regulation (Compan et al., 2011; Meli et al., 2018). Previously, we identified a novel  
84 AQP1a in mud loaches (mmAQP1a) which is differentially modulated *in vivo* ([Lee et al.,](#)  
85 [2017](#)). In fact, the existence of AQP1a and its duplicate in teleost species is well established,  
86 showing specialized expression ([Zapater et al., 2011](#)). We found a AQP1a paralog from our  
87 next-generation sequencing database for the mud loach (unpublished data). The genetic  
88 determinants for the stenohaline freshwater species mud loach AQP1a paralog, called AQP1b  
89 have not been extensively explored. In present study, we identified the AQP1a paralog in  
90 mud loaches. The AQP1a paralog, AQP1b is a teleost-specific water-selective channel that  
91 mediates oocyte hydration, which is based on the coordinated action between osmolyte flux  
92 and aquaporin activity ([Fabra et al., 2005](#); [Sun et al., 2010](#)). We found three variant AQP1b

93 paralogs that are structurally similar to mmAQP1a. In line with our long-term goal to more  
94 deeply understand the involvement of aquaporin molecules in osmoregulation and  
95 physiological processes of mud loaches, we aimed to identify the mRNA splice variants of  
96 AQP1 in mud loach. We characterized the structural and features of the AQP1 promoter and  
97 examined gene expression patterns in response to environmental challenges.

98

## 99 **Materials and methods**

### 100 *Isolation of AQP1b cDNA from mud loaches*

101 To isolate the aquaporin cDNA sequence, a mud loach expressed sequence tag (EST)  
102 database generated from whole body RNAs was surveyed. Based on the EST survey and a  
103 homology search of NCBI GenBank (<http://blast.ncbi.nlm.nih.gov/>), the partial mud loach  
104 AQP sequences were identified. The full-length of mmAQP sequence was obtained from  
105 mud loach total RNAs by RT-PCR and/or Vectorsite PCR isolation using specific primer  
106 pairs (Table 1). At least six clones for each AQP isoform were sequenced to obtain the  
107 representative sequence.

108

### 109 *Cloning the mud loach AQP1b gene and promoter*

110 Based on the full-length cDNA sequences of the mud loach AQP, the gene sequence was  
111 isolated using PCR with AQP1-specific primers that bound the untranslated region (UTR) of  
112 gene. The oligonucleotide primer pairs and PCR conditions used are shown in Table 1. The  
113 amplified PCR products were cloned into pGEM-T easy vector (Promega, Madison, WI,  
114 USA). Sequencing for recombinant clones (n = 6) that contained the correct insert size were  
115 done by primer walking with gene-specific primers. To isolate the 5'-flanking region, genome  
116 walking was performed using a Universal Genome Walker Kit (Clontech Laboratories Inc.,  
117 USA). The DNA fragments obtained from genome walking were subcloned, sequenced, and  
118 assembled into a contig as described. Finally, the AQP genomic DNA spanning the isolated  
119 region was PCR amplified. The PCR products were sequenced to obtain the representative  
120 genomic sequence of the mud loach AQP gene.

121

#### 122 *Bioinformatic sequence analysis*

123 The cDNA sequence was analyzed using the Open Reading Frame (ORF) Finder tool  
124 (<https://www.ncbi.nlm.nih.gov/orffinder/>). Using the deduced amino acid sequence, the  
125 theoretical molecular weight and isoelectric point (pI) were evaluated with the ExPASy  
126 ProtParam online tool (<http://web.expasy.org/protparam/>). A homology search of the mud  
127 loach AQP1 was performed using the NCBI BLASTx algorithm  
128 (<https://blast.ncbi.nlm.nih.gov/Blast.cgi>) and/or the Ensembl genome database

129 (<http://asia.ensembl.org/index.html>). Multiple sequence alignment of the aquaporin amino  
130 acid sequence to representative teleostean and human orthologs (Table 2) was performed  
131 using CLUSTAL W (Thompson et al., 1994). Transmembrane domain prediction was  
132 performed using the TMHMM Server v. 2.0 (<http://www.cbs.dtu.dk/services/TMHMM-2.0/>).  
133 To gain insight into the transcriptional regulation of AQP, putative transcription factor  
134 binding sites (TFBSs) in the proximal promoter region were identified using MatInspector  
135 software (<http://www.genomatix.de>) This prediction was performed using the default  
136 parameters [General Core Promoter Elements (0.9 core / Optimized matrix sim) and  
137 Vertebrates (0.9 core / Optimized matrix sim)] based on Matrix Family Library Version 11.0  
138 (September 2017). We then characterized the regulatory regions of AQP1a.2 gene promoter  
139 by sequencing 3405 bp from the 5'-flanking region and analyzed this region for *cis*-regulatory  
140 elements using MatInspector software.

141

#### 142 *Tissue sampling for basal expression assays*

143 To investigate the constitutive expression of AQP in various adult mud loach tissues, we  
144 collected samples from 13 different tissues (brain, eye, fin, gill, heart, intestine, kidney, liver,  
145 muscle, skin, spleen, ovary, and testis) w from six-month-old healthy females (mean body  
146 mass =  $19 \pm 4$  g;  $n = 8$  for each group) and males (mean body mass =  $12 \pm 3$  g;  $n = 8$  for each  
147 group). The tissues from the sampled individuals were pooled prior to total RNA extraction.



148

149 *Sampling for embryos and early larvae*

150 Fertilized eggs were collected by mating female fish with male fish using the “wet method”  
151 (Nam et al., 2004). The fertilized eggs [referred to as zero hours post-fertilization (HPF);  
152 hour 0] were incubated and kept at  $25 \pm 0.5^\circ\text{C}$  and under an ambient photoperiod until  
153 hatching. The embryonic developmental stages were determined according to Nam et al.  
154 (2004). The embryos were pooled at the 32 cell (2 HPF), early blastula (4 HPF), early  
155 gastrula (6 HPF), late gastrula (8 HPF), 3-4 myotome (12 HPF), 16-17 myotome (16 HPF),  
156 and 23-24 myotome (20 HPF) stages. Hatching started at 24 HPF and 100% of the embryos  
157 hatched by 28 HPF. After hatching, the larvae were transferred to a 50-L tank held at  $24 \pm$   
158  $0.5^\circ\text{C}$ . 100 to 150 larvae were collected at 1, 2, 3, 4, 5, 6, 7, and 14 days post-hatching (DPH).  
159 Larva rearing was performed as previously described (Nam et al., 2004).

160

161 *In vivo stimulatory treatments*

162 We examined AQP1b mRNA expression following acute exposure to cadmium (Cd),  
163 chromium (Cr), copper (Cu), iron (Fe), manganese (Mn), nickel (Ni), or zinc (Zn). Fish (n =  
164 12, average body mass =  $15.2 \pm 4.1$  g) were separated into seven experimental groups (one  
165 per metal) and one control group and kept in 60 L tanks with the respective treatment. The  
166 tanks were filled with tap water and held at  $25 \pm 0.5^\circ\text{C}$ . Each group was acclimated to the

167 tanks for one week. The dose for each metal was 5  $\mu\text{M}$  (Cho et al., 2009), and the exposure  
168 time was 48 h. All chemicals were of analytical or reagent grade and were obtained from  
169 Sigma-Aldrich. No feed was supplied during the exposure period. The tank water was  
170 changed every day to maintain the desired metal concentration. The control group was kept in  
171 the same condition as the other groups without the addition of any metals. After 48 h of  
172 exposure, four tissues (liver, intestine, kidney, and spleen) were collected.

173 To examine potential immune responses, fish ( $15.2 \pm 4.1$  g;  $n = 3$  for each group) were  
174 intraperitoneally injected with lipopolysaccharide (LPS; *Escherichia coli* 0111:B4, Sigma-  
175 Aldrich, St Louis, MO, USA), polyinosinic:polycytidylic acid [poly(I:C); Sigma-Aldrich], or  
176 phosphate buffer saline (PBS, pH 6.8; non-stimulated control). For LPS or poly(I:C)  
177 challenge, two doses (5 or 25  $\mu\text{g g}^{-1}$  body weight) were tested. After being injected, each  
178 group was transferred to a 60 L tank at 25°C. No feed was supplied during this period. At 24  
179 h post-injection, immune-relevant tissues were surgically removed from each fish and stored  
180 at -80°C until analyzed by RT-PCR.

181

#### 182 *RT-PCR analysis*

183 Total RNA was extracted using TriPure Reagent (Roche Applied Science, Mannheim,  
184 Germany) and purified using an RNeasy Mini Plus Kit (Qiagen, Hilden, Germany), including  
185 DNase I treatment. For individual experiments, 2  $\mu\text{g}$  total RNA was used for cDNA synthesis

186 using an Omniscript Reverse Transcription Kit (Qiagen). For the quantitative real-time PCR,  
187 the cDNA was diluted 4-fold with sterile distilled water and 2  $\mu$ L was used as the template  
188 for each qPCR reaction. The qRT-PCR analysis was conducted using a LightCycler 480  
189 Real-Time PCR System and LightCycler 480 SYBR Green I Master mix (Roche Applied  
190 Science, Germany). 18S RNA (adult tissue and embryonic-early larval samples) and  
191 ribosomal protein 7 (RPL7 experimental stimulation analysis) were chosen as the internal  
192 control genes. The plasmid DNAs containing the amplified target mRNAs were prepared as  
193 standard samples. The qRT-PCR analysis for each experiment included three technical  
194 replicates for each biological specimen.

195 To compare AQP1a.2 transcript levels across tissue types and developmental samples, qPCR  
196 data were analyzed using the  $\Delta$ Ct method (Ct of the AQP1b gene subtracted from the Ct of  
197 the internal control genes). The relative AQP1a.2 gene expression in the stimulated or  
198 challenged groups was analyzed as the fold difference compared to the control group using  
199 the  $2^{-\Delta\Delta Ct}$  method (Schmittgen and Livak, 2008).

200

#### 201 *Statistical analysis*

202 All data are expressed as means  $\pm$  standard error. The data were analyzed using one-way  
203 ANOVA followed by Duncan's multiple range tests included in SPSS version 10.0 software  
204 (SAS Inc., Cary, NC, USA).  $P < 0.05$  was considered statistically significant.

205

206 **Results**

207

208 *Characteristics of the AQP1b isoform*

209 The AQP1b gene from the mud loach (named mmAQP1b) is 857 bp long with an open  
210 reading frame (ORF) encoding 269 amino acids. The calculated molecular mass of this  
211 isoform is 28.86 kDa, with a theoretical pI value of 9.35. The nucleotide sequence of the  
212 AQP1b cDNA sequence was submitted to GenBank under the accession numbers  
213 MT184376-MT184378 (genomic DNA MT184375). The deduced amino acid sequence of  
214 mmAQP1b shares the same core architecture as the vertebrate AQPs, including six  
215 transmembrane domains and cytoplasmic amino and carboxy termini (Fig. 1). The two  
216 hydrophobic loops contain asparagine-proline-alanine (NPA) motifs that regulate selective  
217 water conduction and maintain proton gradients across the biological membrane (Gonen and  
218 Walz, 2006). The alignment of the putative amino acid sequence of mmAQP1b and  
219 orthologous sequences from other teleosts revealed considerable similarity (51-84%) (Table  
220 2). In addition, the cysteine residue near the second NPA motif, which is involved in  
221 sensitivity to mercury, was identified in mmAQP1b (Preston et al., 1993).

222

223 *Identification of novel splice variants, genomic structure, and organization of mud loach*

224 *aquaporin 1b*

225 While confirming the full-length mmAQP1b cDNA, we identified three different AQP1b  
226 transcript variants, which we designated mmAQP1b\_tv1, mmAQP1b\_tv2, and  
227 mmAQP1b\_tv3. These variants were 944, 932, and 819 bp long, respectively. Alignment of  
228 the AQP transcripts sequences with other teleosts revealed that the variants arose from  
229 alternative splicing between exon 4 and exon 5 for AQP1b\_tv2 and AQP1b\_tv3. All  
230 transcript variants had ATG as the start codon and encoded a 269-amino acids peptide with a  
231 molecular mass of 28.9 kDa.

232 At the genomic level, the mmAQP1b gene contains five exons (366, 165, 81, 178, and 20 bp  
233 in length for exon-I to exon-V, respectively) interrupted by four introns (1367, 185, 454,  
234 4036 bp in length for intron-I to intron-IV, respectively). The splice sites contained conserved  
235 GT-AG dinucleotides at each junction, and the sequence of each coding exon was clearly  
236 matched with its corresponding cDNA sequence.

237

238 *In silico analysis of transcription factor binding sites in the mmAQP1b promoter region*

239 To identify the transcription factor regulating mmAQP1b expression, we sequenced a 3405  
240 bp upstream region and analyzed this region for *cis*-regulatory elements using MatInspector  
241 software. The transcription start site of AQP1b mRNA was located at -9 bp upstream of the

242 translational ATG initiation codon. We also detected the presence of consensus sequences for  
243 core promoter elements important for basal transcription, such as a TATA box (Table 2). In  
244 addition, various elements involved with immune modulation or stress responses were  
245 observed, including CCAAT-enhancer binding protein (CEBP) sites, cAMP-responsive  
246 element binding protein (CREB) sites, nuclear factor of activated T-cells (NFAT) sites, and  
247 signal transducer and activator of transcription (STAT) sites. Interestingly, we identified  
248 binding sites for three Sry-related high mobility group [HMG]-box (Sox) family members  
249 known to be expressed in teleost oocytes. The binding sites for Sox5, Sox6, and Sox3 were  
250 located at -2575 bp, -268 bp, and -1048 bp from the transcription initiation site, respectively.  
251 In addition, fork head domain factor (Fox), which are involved in development of lung, brain,  
252 thymus, and cardiac tissue, had a predicted binding site at -2572 bp based on the consensus  
253 sequence. Binding sites for hepatic nuclear factor 1 (HNF1), a transcription factor that  
254 regulates ubiquitous expression in many tissues and cells, were also observed at various  
255 locations within the AQP1b promoter.

256

### 257 *Tissue distribution and developmental expression of mmAQP1b*

258 mmAQP1b transcript was detected in all examined tissues, although the basal expression  
259 level was largely different among these tissues. High AQP1b mRNA expression was detected

260 in the gill, kidney, and spleen, whereas lower expression was observed in the liver, muscle,  
261 and skin (Fig. 2).

262 The mRNA expression level of mmAQP1b was regulated during embryonic and larval  
263 development (Fig. 3). mmAQP1b expression was low at fertilization (0 hpt) and further  
264 decreased until 6 hpt (early gastrula stage). Expression gradually begun to increase with  
265 developmental stage until 28 hpt. Afterward, mmAQP1b expression in embryos was  
266 remarkably increased until hatching, and dynamically increased even more until 2 dph. Then,  
267 mmAQP1b mRNA decreased to the level observed at 28 hpt, although the rate of decrease  
268 slowed 4 to 7 dph.

269

#### 270 *Modulation of mmAQP1b in response to heavy metal exposure*

271 The response of mmAQP1b to acute waterborne metal exposure was variable according to  
272 the metal and tissue type. In the intestine, AQP1b transcription was upregulated by most  
273 heavy metals. Cu and Fe caused 3.6- and 2.0-fold decreases of AQP1b transcription,  
274 respectively. Ni exposure did not significantly alter mRNA transcription. In the kidney,  
275 transcriptional suppression occurred in the groups exposed to Cu (7.3-fold decrease), Fe (3.2-  
276 fold), and Mn (2.0-fold). The maximum induction of AQP1b transcript in the kidney was  
277 observed with Cr (2.12-fold) treatment. Meanwhile, hepatic AQP1b transcription was  
278 induced by all tested metals. Three metals, Cd (25.2-fold increase relative the non-exposed

279 control), Cr (15.1-fold), and Ni (9.18-fold) induced more AQP1b transcription in the liver  
280 than the other heavy metals: Cu (5.1-fold) and Zn (2.59-fold). In the spleen, four metal-  
281 treated groups did not show increased AQP1b mRNA. Of the four groups, one group (Cu)  
282 displayed significantly reduced AQP1b mRNA after challenge. Maximum inducibility in the  
283 spleen was 2-fold (the Cu-exposed group), while the other treatments induced only  
284 moderately increased AQP1b transcription from 1.19-1.28 folds.

285

#### 286 *AQP expression after immune challenge*

287

288 Experimental challenge with LPS and poly(I:C) altered AQP1b gene expression in many  
289 groups, and the patterns were variable among tissues types (Fig. 5). In the intestine,  
290 mmAQP1b mRNA was reduced by LPS or poly(I:C) challenge (each 1.27-fold lower than the  
291 relative PBS-injected group). In contrast, renal AQP1b expression was significantly  
292 upregulated in all challenge groups, with 2.21-fold or 3.34-fold increases relative to PBS-  
293 injected controls. A similar pattern was observed in the spleen. AQP1b mRNA expression in  
294 the spleen was induced by LPS (2.1-fold) and poly(I:C) (1.93-fold). In the liver, LPS  
295 downregulated AQP1b mRNA by 2.32-fold. Other challenges did not show significant  
296 differences.

297



298

## 299 **Discussion**

300 We determined that mmAQP1b is similar in sequence and predicted topology to previously  
301 identified AQPs. The mud loach AQP1b has traditional structural features of aquaporins,  
302 such as six transmembrane domains. These are vital characteristics that appear in the major  
303 intrinsic protein (MIP) family and in aquaporins (Borgnia et al., 1999). The tandem repeat  
304 structures with two NPA sequences have been proposed to form tight turn structures that  
305 interact in the membrane to form the pathway for water to move through the protein (Nielsen  
306 et al., 1999). At the genome level, the mmAQP1b gene has a somewhat different  
307 organizational structure (*i.e.* 5 exons interrupted by 4 introns) compared to most other  
308 teleostean AQP1 orthologues, which have 4 exons (Tingaud-Sequeira et al. 2008, 2010; Kim  
309 et al., 2014). We also isolated the complete mRNA of two AQP1b transcript variants.  
310 Analysis of mmAQP1b cDNA using available information on the genome organization of the  
311 AQP gene in teleost suggest that each isoform is generated by alternative splicing. This leads  
312 to a splicing event where the 5' splice site of the intron is different, which leads to mRNAs  
313 with different C-termini. However, the rest of the AQP gene sequence is highly conserved  
314 between the two variants.  
315 *In silico* analysis of mmAQP1b promotor identified various putative cis-regulatory elements  
316 that may serve targets for sequence-specific transcription factors. We found numerous

317 consensus sequences that may be bound by transcription factors involved in stress and/or  
318 innate immunity in teleosts such as STAT, CEBP, CREB, and NFAT5. In particular, NFAT5,  
319 a member of the nuclear factor of activated T cell family, plays crucial roles in detecting  
320 environmental salinity and immune responses under pathophysiological conditions associated  
321 with hyperosmotic stress in teleosts and mammals (Küper et al., 2015; Lorgn et al., 2017). In  
322 addition, the canonical motifs for STAT, a key factor in the JAK/STAT pathway were  
323 identified, suggesting that AQP1b is involved in inflammation-mediated modulation upon  
324 pathogen infection. This observation is consistent with the expression profiles of AQP1a and  
325 3a in kidney, intestine, liver, and spleen of mud loaches after immune challenge (Lee et al.,  
326 2017). The mmAQP1b promoter possesses potential CREB sites responsive to cAMP, similar  
327 to those found in mammalian and teleost AQP genes (Zapater et al., 2013; Wang and Zheng,  
328 2011). We also observed a potentially conserved site for glucocorticoid-responsive and  
329 related elements, which are induced by glucocorticoid or progesterone receptors in mammals  
330 and teleosts (Zapater et al., 2013; Lieberman et al., 1993; Moon et al., 1997). Additionally,  
331 HNF-1 is a major regulator of glucose homeostasis in the liver, kidney, and pancreas in  
332 mammals (Pontoglio, 2000). This evidence indicates that AQP-mediated cellular pathways  
333 could be directly or indirectly associated with carbohydrate metabolism in the teleost liver for  
334 energy supply during saline challenge.

335 Interestingly, the *in silico* analysis showed putative binding sites for SOX transcription

336 factors in the mmAQP1b promoter region, similar to several fish species (Cerdà et al., 2013;  
337 Zapater, et al., 2013; Wei et al., 2016). Recently, SOX transcription factors were reported to  
338 be involved in diverse physiological processes such as the formation of the nervous system  
339 (Overton et al., 2002), gonadogenesis (Weiss et al., 2003), or sex determining factor.  
340 During embryonic development, mmAQP1b expression was weakly expressed during early  
341 embryogenesis, followed by a considerable increase until 2 dph and a subsequent decline.  
342 Additionally, AQP1b expression is firstly detected from the onset of fertilization to the 32-  
343 cell stage, indicating that AQP1b is maternally inherited, as reported for the common  
344 mummichog (*Fundulus heteroclitus*) and zebrafish (Tingaud-Sequeira et al., 2009; Chen et al.,  
345 2010). Maternal molecules such as transcripts and protein are provided as a source as of  
346 cellular energy, structural components, and defense responses during embryonic and larval  
347 development in fish. In addition, there was a decrease in mmAQP1b transcript levels from 4-  
348 6 HPF (early blastula-gastrula stage).  
349 In the present study, the expression of mmAQP1b mRNA was detectable in various tissues,  
350 including the gill, kidney, and spleen. Some tissues also showed difference in transcript levels.  
351 The freshwater teleost kidney is unable to produce hyperosmotic urine, in contrast to  
352 seawater-adapted piscine kidneys, which switch to water saving function via expression of  
353 divalent ions. Therefore, the function of piscine renal AQP is regulated by environmental  
354 salinity (Tipsmark et al., 2010). The expression of AQP1a.2 transcript is not limited to

355 osmoregulatory tissues, but may also occur in non-osmoregulatory tissues (eye, spleen, and  
356 testis), as suggested in several teleost species (An et al., 2008; Tingaud-Sequeira, 2010; Kim  
357 et al., 2010, 2014; Madsen et al., 2014).

358 AQP1b transcription showed the significant responses to the immunostimulants LPS and  
359 poly(I:C). In particular, renal and splenic AQP1b transcripts were significantly higher than in  
360 other tissues. As evidenced by Lehmann et al. (2008), intraperitoneal LPS injection allows  
361 LPS immediate access to the circulation. Therefore, LPS induces systemic immune responses.  
362 The kidney is the primary excretory organ critical for the maintenance of homeostasis in fish.  
363 A recent study suggested that intraperitoneal LPS injection decreases blood flow in the spleen  
364 and kidney via vasoconstriction, thereby increasing the volume of interstitial fluid and  
365 redistributing blood flow (Wang et al., 2018). Thus, LPS challenge may ultimately impair the  
366 transient osmotic gradient, indicating an improper balance of the stable internal water  
367 environment and dissolved ion concentrations in the kidney. A previous study reported that  
368 upregulated AQP1 transcripts serves a protective role by reversing LPS-induced damage in  
369 human renal proximal tubule epithelial cells (Wang et al., 2018). Thus, altered AQP1a  
370 protein expression is associated with altered renal physiology.

371 AQPs have been proposed as molecular osmosensors that maintain water homeostasis.  
372 Further, AQPs are a possible regulator of innate host defenses at the level of the plasma  
373 membrane (Meli et al., 2018). In the present investigation, we characterized AQP variant

374 transcript levels and investigated AQP1b modulation in response to heavy metal exposure  
375 and immune challenge. This study provides a comprehensive basis and strengthens the  
376 knowledge of the underlying mechanisms of AQP in physiological and pathological  
377 processes. Further studies to deepen the knowledge of fish AQP-mediated mechanisms  
378 potentially relevant to molecular pathogenesis are required.

379

### 380 **Competing interests**

381 The authors declare that they have no conflict of interest.

382

### 383 **Funding**

384 This research was supported by the grant from the Korea Institute of Marine Science &  
385 Technology (KIMST) funded by the Ministry of Oceans and Fisheries (Project #20170327).

386

### 387 **Authors' contributions**

388 Sang Yoon Lee contributed to the management of mu loach, gene-cloning, gene-  
389 expression analyses and data analysis and; Yi Kyung Kim and Yoon Kwon Nam  
390 developed and supervised the experiment, and preparation of the manuscript draft, and  
391 modified the manuscript.

392

393

394 **References**

- 395 **An, K. W., Kim, N. N. and Choi, C. Y.** (2008). Cloning and expression of aquaporin 1 and  
396 arginine vasotocin receptor mRNA from the black porgy, *Acanthopagrus schlegli*: effect  
397 of freshwater acclimation. *Fish Physiol. Biochem.* 34, 185-194.
- 398 **Baltzegar, D. A., Reading, B. J., Douros, J. D. and Borski, R. J.** (2013). Role for leptin in  
399 promoting glucose mobilization during acute hyperosmotic stress in teleost fishes. *J.*  
400 *Endocrinol.* doi: 10.1530/JOE-13-0292.
- 401 **Borgnia, M., Nielsen, S., Engel, A. and Agre, P.** (1999). Cellular and molecular biology of  
402 the aquaporin. *Annu. Rev. Biochem.* 68, 425-458.
- 403 **Compan, V., Baroja-Mazo, A., López-Castejón, G., Gomez, A. I., Martínez, C. M.,**  
404 **Angosto, D., Montero, M. T., Herranz, A. S., Bazán, E., Reimers, D., Mulero, V. and**  
405 **Pelegrín, P.** (2012). Cell volume regulation modulates NLRP3 inflammasome activation.  
406 *Immunity* 37, 487–500.
- 407 **Chenna, R., Sugawara, H., Koike, T., Lopez, R., Gibson, T. J., Higgins, D. G. and**  
408 **Thompson, T. D.** (2003). Multiple sequence alignment with the clustal series of  
409 programs. *Nucleic Acids Res.* 31, 3497–3500.

- 410 **Chen, L. M., Zhao, J., Musa-Aziz, R., Pelletier, M. F., Drummond, I. A., and Boron, W.**  
411 **F.** (2010). Cloning and characterization of a zebrafish homologue of human AQP1: a  
412 bifunctional water and gas channel. *Am. J. Physiol.* 299, R1163–R1174.
- 413 **Cho, Y. S., Lee, S. Y., Kim, K. Y. and Nam, Y. K.** (2009). Two metallothionein genes from  
414 mud loach *Misgurnus mizolepis* (Teleostei; Cypriniformes): Gene structure, genomic  
415 organization, and mRNA expression analysis. *Comp. Biochem. Physiol.* 153B, 317-326.
- 416 **Cho, Y. S., Kim, B. S., Kim, D. S. and Nam, Y. K.** (2012). Modulation of warm-  
417 temperature-acclimation-associated 65-kDa protein genes (*Wap65-1* and *Wap65-2*) in  
418 mud loach (*Misgurnus mizolepis*, Cypriniformes) liver in response to different  
419 stimulatory treatments. *Fish Shellfish Immunol.* 32, 662-669.
- 420 **Cerdà, J., Zapater, C., Chauvigné, F. and Finn, R. N.** (2013). Water homeostasis in the  
421 fish oocyte: new insights into the role and molecular regulation of a teleost-specific  
422 aquaporin. *Fish Physiol. Biochem.* 39, 19-27.
- 423 **Cutler, C. P. and Cramb, G.** (2000). Water transport and aquaporin expression in fish. In  
424 *Molecular biology and physiology of water and solute transport*, pp. 433-441. Springer,  
425 Boston, MA.
- 426 **Fabra, M., Raldúa, D., Power, D. M., Deen, P. M. and Cerda, J.** (2005). Marine fish egg  
427 hydration is aquaporin-mediated. *Science*, 307, 545-545.



- 428 **Fiol D. F. and Kültz D.** (2007). Osmotic stress sensing and signaling in fishes. *FEBS J.* 274,  
429 5790-5798.
- 430 **Finn, R. N. and Cerdà, J.** (2011). Aquaporin evolution in fishes. *Front. Physiol.* 26, 2:44.  
431 doi: 10.3389/fphys.2011.00044.
- 432 **Finn, R. N., Chauvigné, F., Hlidberg, J. B., Cutler, C. P. and Cerdà, J.** (2014). The  
433 lineage-specific evolution of aquaporin gene clusters facilitated tetrapod terrestrial  
434 adaptation. *PloS one*, 9, e113686.
- 435 **Giffard-Mena, I., Boulo, V., Abed, C., Cramb, G. and Charmantier, G.** (2011).  
436 Expression and localization of Aquaporin 1a in the sea-bass (*Dicentrarchus labrax*)  
437 during ontogeny. *Front. Physiol.* 2, 34.
- 438 **Ishibashi, K., Kondo, S., Hara, S. and Morishita, Y.** (2011). The evolutionary aspects of  
439 aquaporin family. *Am. J. Physiol.* 300, R566-576.
- 440 **Kim, Y. K., Watanabe, S., Kaneko, T., Huh, M. D. and Park, S. I.** (2010). Expression of  
441 aquaporins 3, 8 and 10 in the intestines of freshwater- and seawater-acclimated Japanese  
442 eels *Anguilla japonica*. *Fish. Sci.* 76, 695-702.
- 443 **Kim, Y. K., Lee, S. Y., Kim, B. S., Kim, D. S. and Nam, Y. K.** (2014). Isolation and  
444 mRNA expression analysis of aquaporin isoforms in marine medaka *Oryzias dancena*, a  
445 euryhaline teleost. *Comp. Biochem. Physiol.* 171, A1-8.

- 446 King, L.S., Kozono, D., Agre, P., 2004. From structure to disease: the evolving tale of  
447 aquaporin biology. *Nat. Rev. Mol. Cell Biol.* 24, 224-234.
- 448 Kozono, D., Ding, X., Iwasaki, I., Meng, X., Kamagata, Y., Agre, P., Kitagawa, Y., 2003.  
449 Functional expression and characterization of an archaeal aquaporin AqpM from  
450 *Methanothermobacter marburgensis*. *J. Biol. Chem.* 278, 10649-10656.
- 451 Küper, C., Beck, F. X., & Neuhofer, W. (2015). Generation of a conditional knockout allele  
452 for the NFAT5 gene in mice. *Frontiers in physiology*, 5, 507.
- 453 Lee, S. Y., Nam, Y. K., & Kim, Y. K. (2017). Characterization and expression profiles of  
454 aquaporins (AQPs) 1a and 3a in mud loach *Misgurnus mizolepis* after experimental  
455 challenges. *Fisheries and Aquatic Sciences*, 20(1), 23.
- 456 Lieberman, B. A., Bona, B. J., Edwards, D. P., & Nordeen, S. K. (1993). The constitution of  
457 a progesterone response element. *Molecular Endocrinology*, 7(4), 515-527.
- 458 Lehmann, G.L., Carreras, F.I., Soria, L.R., Gradilone, S.A., Marinelli, R.A., 2008. LPS  
459 induces the TNF- $\alpha$ -mediated downregulation of rat liver aquaporin-8: role in sepsis-  
460 associated cholestasis. *Am. J. Physiol. Gastrointest. Liver Physiol.* 294, G567-G575.
- 461 Lind, U., Järvå, M., Rosenblad, M. A., Pingitore, P., Karlsson, E., Wrangé, A. L., Kamdal E,  
462 Sundell K, André C, Jonsson PR, Havenhand, J., Eriksson LA, Hedfalk K, Blomberg A.

- 463 (2017). Analysis of aquaporins from the euryhaline barnacle *Balanus improvisus* reveals  
464 differential expression in response to changes in salinity. *PLoS one*, 12(7), e0181192.
- 465 Lorgen, M., Jorgensen, E. H., Jordan, W. C., Martin, S. A., Hazlerigg, D. G. (2017). NFAT5  
466 genes are part of the osmotic regulatory system in Atlantic salmon (*Salmo salar*). *Marine*  
467 *genomics*, 31, 25-31.
- 468 Madsen, S.S., Bujak, J., Tipsmark, C.K., 2014. Aquaporin expression in the Japanese medaka  
469 (*Oryzias latipes*) in freshwater and seawater: challenging the paradigm of intestinal water  
470 transport? *J. Exp. Biol.* 217, 3108-3121.
- 471 Madsen, S. S., Engelund, M. B., & Cutler, C. P. (2015). Water transport and functional  
472 dynamics of aquaporins in osmoregulatory organs of fishes. *The Biological*  
473 *Bulletin*, 229(1), 70-92.
- 474 Meli, R., Pirozzi, C., & Pelagalli, A. (2018). New perspectives on the potential role of  
475 aquaporins (AQPs) in the physiology of inflammation. *Frontiers in physiology*, 9, 101.
- 476 Moon, C., King, L. S., & Agre, P. (1997). Aqp1 expression in erythroleukemia cells: genetic  
477 regulation of glucocorticoid and chemical induction. *American Journal of Physiology-*  
478 *Cell Physiology*, 273(5), C1562-C1570.

- 479 Moshtaghi, A., Rahi, M. L., Nguyen, V. T., Mather, P. B., & Hurwood, D. A. (2016). A  
480 transcriptomic scan for potential candidate genes involved in osmoregulation in an  
481 obligate freshwater palaemonid prawn (*Macrobrachium australiense*). *PeerJ*, 4, e2520.
- 482 Nam, Y. K., Choi, G. C., Kim, D. S. (2004). An efficient method for blocking the 1st mitotic  
483 cleavage of fish zygote using combined thermal treatment, exemplified by mud loach  
484 (*Misgurnus mizolepis*). *Theriogenology*, 61(5), 933-945.
- 485 Nam, Y.K., Cho, Y.S., Lee, S.Y., Kim, B.S., Kim, D.S., 2011. Molecular characterization of  
486 hepcidin gene from mud loach (*Misgurnus mizolepis*; Cypriniformes). *Fish Shellfish*  
487 *Immunol.* 31, 1251-1258.
- 488 Nielsen, S., Kwon, T.H., Christensen, B.M., Promeneur, D., Frøkiaer, J., Marples, D., 1999.  
489 Physiology and pathophysiology of renal aquaporins. *J. Am. Soc. Nephrol.* 10, 647-663.
- 490 Overton PM, Meadows LA, Urban J, Russell S (2002) Evidence for differential and  
491 redundant function of the Sox genes *Dichaete* and *Sox N* during CNS development in  
492 *Drosophila*. *Development* 129: 4219–4228
- 493 Pontoglio M (2000). Hepatocyte nuclear factor 1, a transcription factor at the crossroads of  
494 glucose homeostasis. *J Am Soc Nephrol*, 11(suppl 2), S140-S143.
- 495 Schmittgen, T.D., Livak, K.J., 2008. Analyzing real-time PCR data by the comparative C(T)  
496 method. *Nat. Protoc.* 3, 1101-1108.

- 497 Sun, Y., Zhang, Q., Qi, J., Chen, Y., Zhong, Q., Li, C., ... & Wang, Z. (2010). Identification  
498 of differential genes in the ovary relative to the testis and their expression patterns in half-  
499 smooth tongue sole (*Cynoglossus semilaevis*). *Journal of Genetics and Genomics*, 37(2),  
500 137-145.
- 501 Thompson, J.D., Higgins, D.G., Gibson, T.J., 1994. Clustal W: improving the sensitivity of  
502 progressive multiple sequence alignment through sequence weighting, position specific  
503 gap penalties and weight matrix choice. *Nucleic Acids Res.* 22, 4673-4680.
- 504 Tingaud-Sequeira, A., Chauvigné, F., Fabra, M., Lozano, J., Raldúa, D., & Cerdà, J. (2008).  
505 Structural and functional divergence of two fish aquaporin-1 water channels following  
506 teleost-specific gene duplication. *BMC evolutionary biology*, 8(1), 259.
- 507 Tingaud-Sequeira, A., Zapater, C., Chauvigné, F., Otero, D., and Cerdà, J. (2009). Adaptive plas-  
508 ticity of killifish (*Fundulus heteroclitus*) embryos: dehydration-stimulated development  
509 and differential aquaporin-3 expression. *Am. J. Physiol. Regul. Integr. Comp. Physiol.* 296,  
510 R1041–R1052.
- 511 Tingaud-Sequeira, A., Calusinska, M., Finn, R.N., Chauvigné, F., Lozano, J., Cerdà, J., 2010.  
512 The zebrafish genome encodes the largest vertebrate repertoire of functional aquaporins  
513 with dual paralogy and substrate specificities similar to mammals. *BMC Evol. Biol.* 10, 38.

- 514 Tipsmark, C.K., Sørensen, K.J., and Madsen, S.S. (2010). Aquaporin expression dynamics in  
515 osmoregulatory tissues of Atlantic salmon during smoltification and seawater acclimation.  
516 *J. Exp. Biol.* 213, 368–379.
- 517 Wang, Y., Cui, H., Niu, F., Liu, S. L., Li, Y., Zhang, L. M., Du HB, Zhao ZG, Niu, C. Y.  
518 (2018). Effect of resveratrol on blood rheological properties in LPS-challenged  
519 rats. *Frontiers in physiology*, 9, 1202.
- 520 Wang, W., Zheng, M., 2011. Role of cAMP-PKA/CREB pathway in regulation of AQP 5  
521 production in rat nasal epithelium. *Rhinology* 49, 464–469.
- 522 Wei, L., Yang, C., Tao, W., Wang, D. 2016. Genome-wide identification and transcriptome-  
523 based expression profiling of the sox gene family in the Nile tilapia (*Oreochromis*  
524 *niloticus*). *International journal of molecular sciences*, 17(3), 270.
- 525 Weiss J, Meeks JJ, Hurley L, Raverot G, Frassetto A, et al. (2003) Sox3 is required for  
526 gonadal function, but not sex determination, in males and females. *Molecular and*  
527 *Cellular Biology* 23: 8084–8091
- 528 Wong, K.F., Luk, J.M., Cheng, R.H., Klickstein, L.B., Fan, S.T., 2007. Characterization of  
529 two novel LPS-binding sites in leukocyte integrin  $\beta$ A domain. *FASEB J.* 21, 3231–3239.

- 530 Wong, M.K., Ozaki, H., Suzuki, Y., Iwasaki, W., Takei, Y. 2014. Discovery of osmotic  
531 sensitive transcription factors in fish intestine via a transcriptomic approach. *BMC*  
532 *Genomics* 15:1134. doi: 10.1186/1471-2164-15-1134.
- 533 Wu, X.M., Wang, H.Y., Li, G.F., Zang, B., Chen, W.M., 2009. Dobutamine enhances  
534 alveolar fluid clearance in a rat model of acute lung injury. *Lung* 187, 225–231.
- 535 Yokoi, H., Kobayashi, T., Tanaka, M., Nagahama, Y., Wakamatsu, Y., Takeda, H., ... &  
536 Ozato, K. 2002. Sox9 in a teleost fish, medaka (*Oryzias latipes*): evidence for diversified  
537 function of Sox9 in gonad differentiation. *Molecular Reproduction and Development:*  
538 *Incorporating Gamete Research*, 63(1), 5-16
- 539 Zapater, C., Chauvigné, F., Norberg, B., Finn, R. N., Cerdà, J. 2011. Dual  
540 neofunctionalization of a rapidly evolving aquaporin-1 paralog resulted in constrained  
541 and relaxed traits controlling channel function during meiosis resumption in teleosts.  
542 *Molecular biology and evolution*, 28(11), 3151-3169.
- 543 Zapater, C., Chauvigné, F., Tingaud-Sequeira, A., Finn, R. N., Cerdà, J. 2013. Primary  
544 oocyte transcriptional activation of *aqp1ab* by the nuclear progesterin receptor determines  
545 the pelagic egg phenotype of marine teleosts. *Developmental biology*, 377(2), 345-362.
- 546 Zardoya, R., 2005. Phylogeny and evolution of the major intrinsic protein family. *Biol. Cell*  
547 97, 397-414.





549 **Figure legends**

550

551 Figure 1. Nucleotide alignment of AQP1b variant tv1, tv2, and tv3 cDNA sequences.

552 Nucleotide gaps are represented by dashes (-).

553

554 Figure 2. Multiple amino acid sequence alignments and transmembrane topology prediction

555 of AQP1b transcript variants. Asterisks and hyphens indicate identical residues and gaps

556 introduced for optimum alignments, respectively. Two NPA motifs are shown in bold light

557 blue. The locations of 6 putative membrane-spanning domains are shown by navy boxes

558 above the alignment. *A. japonica*: Japanese eel *Anguilla japonica*; *A. anguilla*: European eel

559 *Anguilla anguilla*; *M. mizolepis* tv1, tv2, tv3: mud loach *Misgurnus mizolepis*; *D. rerio*:

560 zebrafish *Danio rerio*; *S. salar*: Atlantic salmon *Salmo salar*; *S. aurata*: gilt-head sea bream

561 *Sparus aurata*; *S. senegalensis*: Senegalese sole *Solea senegalensis*; *I. punctatus*: channel

562 catfish *Ictalurus punctatus*; *H. fossilis*: stinging catfish *Heteropneustes fossilis*; *O. mordax*:

563 rainbow smelt *Osmerus mordax*; *A. schlegelii*: blackhead seabream *Acanthopagrus schlegelii*;

564 *D. labrax*: European bass *Dicentrarchus labrax*; *T. nigroviridis*: green pufferfish *Tetraodon*

565 *nigroviridis*; *F. heteroclitus*: mummichog *Fundulus heteroclitus*; *H. hippoglossus*: Atlantic

566 halibut *Hippoglossus hippoglossus*; *O. dancena*: marine medaka *Oryzias dancena*; *E. Lucius*:

567 northern pike *Esox Lucius*.

568 Figure 3. Gene organization and mRNA variants of the aquaporin 1ab gene in mud loaches.

569 mmAQP1b genes contain 5 exons. Each exon is represented by a different color and by

570 Roman numerals. The mRNA transcript length is listed on each exon.

571

572 Figure 4. Tissue distribution of mmAQP1b in adult tissues. Abbreviations: brain (Br), eye

573 (Ey), fin (Fi), gill (Gi), heart (He), intestine (In), kidney (Ki), liver (Li), muscle (Mu), spleen

574 (Sp), ovary (Ov), and testis (Te).

575

576 Figure 5. Expression of mmAQP1b mRNA during embryogenesis and larval development.

577 Variant transcripts in different tissues under abiotic stress. Data are represented as means  $\pm$

578 SDs. Letters indicate significant difference (one-way ANOVA).

579

580 Figure 6. Transcriptional responses of mmAQP1b to acute metal exposure in different tissues.

581 AQP1b expression in metal-exposed groups are expressed as fold changes relative to the non-

582 exposed control group. Data represent means  $\pm$  SDs. Different letters indicate significant

583 differences, as analyzed by ANOVA followed by Duncan's multiple range tests.

584

585 Figure 7. Differential modulation of mmAQP isoforms by immunostimulant exposure. Data

586 represent means  $\pm$  SDs, with letters indicating significant differences, as analyzed by

587 ANOVA followed by Duncan's multiple range tests.

588

MM\_AQP1b\_x1 ATGGCACGGGAGTTAAGAGTTGGTCTTTTTGGCGGGCAGTATTGGCCGAGTTTGTGGGATGACCCTTTTATTTTCATCGGTATAGCCTCCGCTATCGGTAACAAGCATAACAAATTTCTGACCAA  
MM\_AQP1b\_x2 ATGGCACGGGAGTTAAGAGTTGGTCTTTTTGGCGGGCAGTATTGGCCGAGTTTGTGGGATGACCCTTTTATTTTCATCGGTATAGCCTCCGCTATCGGTAACAAGCATAACAAATTTCTGACCAA  
MM\_AQP1b\_x3 ATGGCACGGGAGTTAAGAGTTGGTCTTTTTGGCGGGCAGTATTGGCCGAGTTTGTGGGATGACCCTTTTATTTTCATCGGTATAGCCTCCGCTATCGGTAACAAGCATAACAAATTTCTGACCAA  
\*\*\*\*\*  
MM\_AQP1b\_x1 GAGGTTAAAGTAGCTTTAGCTTTTGGTCTGGCCATTGCAACACTCGCTCAGAGTTTGGGCATATCAGTGGAGCCACCTGAACCCAGCGGTTACCGTAGGAGTGTTAGTTAGCTGTCAGATCAGCTTC  
MM\_AQP1b\_x2 GAGGTTAAAGTAGCTTTAGCTTTTGGTCTGGCCATTGCAACACTCGCTCAGAGTTTGGGCATATCAGTGGAGCCACCTGAACCCAGCGGTTACCGTAGGAGTGTTAGTTAGCTGTCAGATCAGCTTC  
MM\_AQP1b\_x3 GAGGTTAAAGTAGCTTTAGCTTTTGGTCTGGCCATTGCAACACTCGCTCAGAGTTTGGGCATATCAGTGGAGCCACCTGAACCCAGCGGTTACCGTAGGAGTGTTAGTTAGCTGTCAGATCAGCTTC  
\*\*\*\*\*  
MM\_AQP1b\_x1 TTCAGGGCCATCATGTATATTGTTGCTCAGATGTTAGGGGCTGTTGTGGCAAGTGGCATCATGTTCAAAGTTAGCCCGACCCCTGAATCAACACTGGGGCTTAATATGCTGAGTCGGGTGTA AAAACA  
MM\_AQP1b\_x2 TTCAGGGCCATCATGTATATTGTTGCTCAGATGTTAGGGGCTGTTGTGGCAAGTGGCATCATGTTCAAAGTTAGCCCGACCCCTGAATCAACACTGGGGCTTAATATGCTGAGTCGGGTGTA AAAACA  
MM\_AQP1b\_x3 TTCAGGGCCATCATGTATATTGTTGCTCAGATGTTAGGGGCTGTTGTGGCAAGTGGCATCATGTTCAAAGTTAGCCCGACCCCTGAATCAACACTGGGGCTTAATATGCTGAGTCGGGTGTA AAAACA  
\*\*\*\*\*  
MM\_AQP1b\_x1 GGTGAGGCTTTGCCATTGAGCTTTTTGCAACATTTAGCTGGTCTCTGTGTGTTGGCCACAACAGATAAGCGTCGAACCGATGTTATGGGCTCTGCACCTCTTGCCATCGGGCTATCGGTTGGTTTG  
MM\_AQP1b\_x2 GGTGAGGCTTTGCCATTGAGCTTTTTGCAACATTTAGCTGGTCTCTGTGTGTTGGCCACAACAGATAAGCGTCGAACCGATGTTATGGGCTCTGCACCTCTTGCCATCGGGCTATCGGTTGGTTTG  
MM\_AQP1b\_x3 GGTGAGGCTTTGCCATTGAGCTTTTTGCAACATTTAGCTGGTCTCTGTGTGTTGGCCACAACAGATAAGCGTCGAACCGATGTTATGGGCTCTGCACCTCTTGCCATCGGGCTATCGGTTGGTTTG  
\*\*\*\*\*  
MM\_AQP1ab\_x1 GGACACCTGGTAGCTATCAGTTACACCGGGTGC GGATCAATCCTGCTCGATCTTTCCGACCAGCTGTTGTTCTTGAAGCATTCAAAAACCAAGTGGATATACTGGATTGCGCCCTTGACCGGAGG GGTG  
MM\_AQP1ab\_x2 GGACACCTGGTAGCTATCAGTTACACCGGGTGC GGATCAATCCTGCTCGATCTTTCCGACCAGCTGTTGTTCTTGAAGCATTCAAAAACCAAGTGGATATACTGGATTGCGCCCTTGACCGGAGG GGTG  
MM\_AQP1ab\_x3 GGACACCTGGTAGCTATCAGTTACACCGGGTGC GGATCAATCCTGCTCGATCTTTCCGACCAGCTGTTGTTCTTGAAGCATTCAAAAACCAAGTGGATATACTGGATTGCGCCCTTGACCGGAGG GGTG  
\*\*\*\*\*  
MM\_AQP1ab\_x1 GCCGCTGCCCTTGTGTACGACTTCTTGCTGTACCCAAAGAAGGAAGGGTTTGGCAGGCGCATGAATGTTCTGAAAAGTGGCGAAGAACC GGAATCGTCTGCGACTGAACCCCTAATCGAACCAAG AACCC  
MM\_AQP1ab\_x2 GCCGCTGCCCTTGTGTACGACTTCTTGCTGTACCCAAAGAAGGAAGGGTTTGGCAGGCGCATGAATGTTCTGAAAAGTGGCGAAGAACC GGAATCGTCTGCGACTGAACCCCTAATCGAACCAAG AACCC  
MM\_AQP1ab\_x3 GCCGCTGCCCTTGTGTACGACTTCTTGCTGTACCCAAAGAAGGAAGGGTTTGGCAGGCGCATGAATGTTCTGAAAAGTGGCGAAGAACC GGAATCGTCTGCGACTGAACCCCTAATCGAACCAAG AACCC  
\*\*\*\*\*  
MM\_AQP1ab\_x1 CCCAGATCTGGTTCTGgtcagtggtccaggcca~~tg~~gatgtgatgagtcttGAGGTCTAGGAGATGAGTGA  
MM\_AQP1ab\_x2 CCCAGATCTGGTTCTGgtcagtggtccaggcca~~tg~~gat-----GAGGTCTAGGAGATGAGTGA  
MM\_AQP1ab\_x3 CCCAGATCTGGTTCTG-----GAGGTCTAGGAGATGAGTGA  
\*\*\*\*\*

|              | TM1                                                                                                                                                                                                                                                     | TM2                                                                                                                                                                                                                           | TM3       | TM4       |  |
|--------------|---------------------------------------------------------------------------------------------------------------------------------------------------------------------------------------------------------------------------------------------------------|-------------------------------------------------------------------------------------------------------------------------------------------------------------------------------------------------------------------------------|-----------|-----------|--|
| <b>AQP1b</b> | <i>A. japonica</i><br><i>A. anguilla</i><br><i>M. mizolepis</i> x1<br><i>M. mizolepis</i> x2<br><i>M. mizolepis</i> x3<br><i>D. rerio</i><br><i>S. salar</i><br><i>S. aurata</i><br><i>S. senegalensis</i><br><i>I. punctatus</i><br><i>H. fossilis</i> | <i>M. mizolepis</i><br><i>D. rerio</i><br><i>O. mordax</i><br><i>A. schlegelii</i><br><i>D. labrax</i><br><i>T. nigroviridis</i><br><i>F. heteroclitus</i><br><i>H. hippoglossus</i><br><i>O. dancena</i><br><i>E. lucius</i> |           |           |  |
|              | * * * * *                                                                                                                                                                                                                                               | * * * * *                                                                                                                                                                                                                     | * * * * * | * * * * * |  |

|              | TM5                                                                                                                                                                                                                                                     | TM6                                                                                                                                                                                                                           |                                                                                                                                          |
|--------------|---------------------------------------------------------------------------------------------------------------------------------------------------------------------------------------------------------------------------------------------------------|-------------------------------------------------------------------------------------------------------------------------------------------------------------------------------------------------------------------------------|------------------------------------------------------------------------------------------------------------------------------------------|
| <b>AQP1b</b> | <i>A. japonica</i><br><i>A. anguilla</i><br><i>M. mizolepis</i> x1<br><i>M. mizolepis</i> x2<br><i>M. mizolepis</i> x3<br><i>D. rerio</i><br><i>S. salar</i><br><i>S. aurata</i><br><i>S. senegalensis</i><br><i>I. punctatus</i><br><i>H. fossilis</i> | <i>M. mizolepis</i><br><i>D. rerio</i><br><i>O. mordax</i><br><i>A. schlegelii</i><br><i>D. labrax</i><br><i>T. nigroviridis</i><br><i>F. heteroclitus</i><br><i>H. hippoglossus</i><br><i>O. dancena</i><br><i>E. lucius</i> | 262<br>262<br>269<br>269<br>269<br>269<br>267<br>266<br>271<br>263<br>260<br>260<br>262<br>261<br>261<br>261<br>261<br>261<br>261<br>260 |
|              | * * * * *                                                                                                                                                                                                                                               | * * * * *                                                                                                                                                                                                                     |                                                                                                                                          |

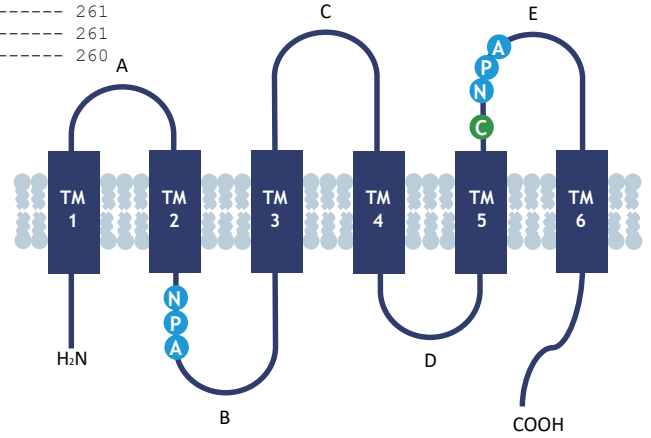

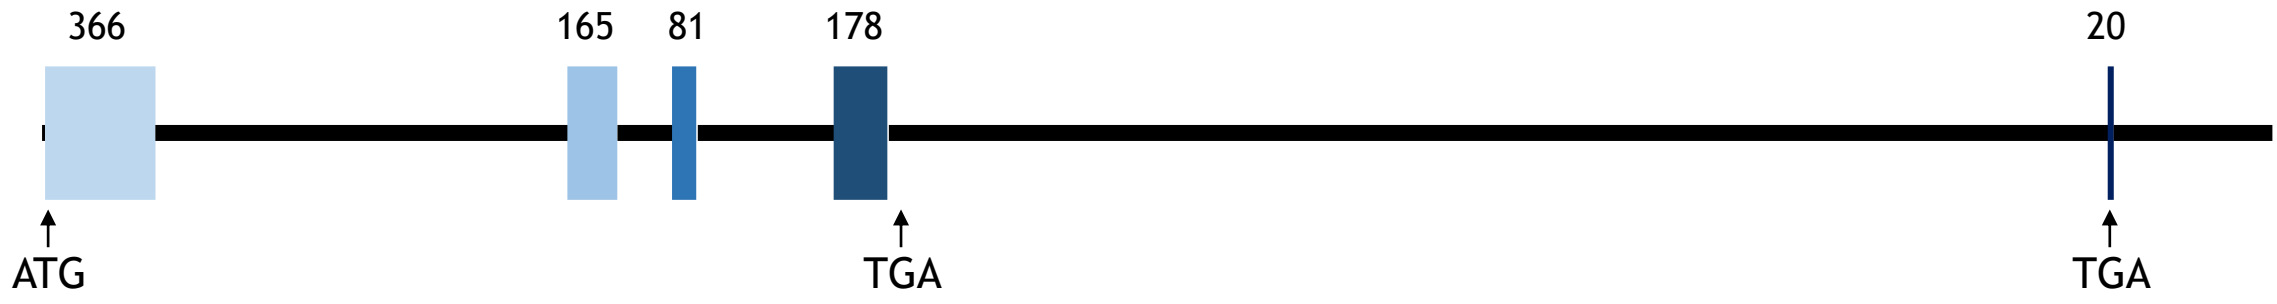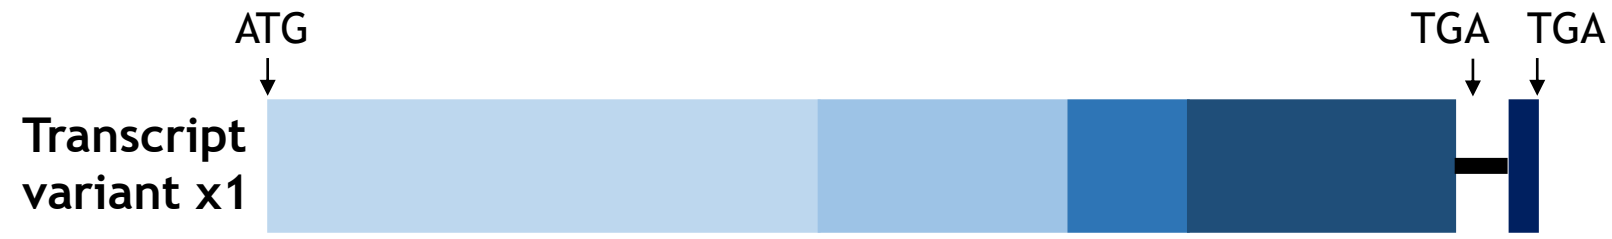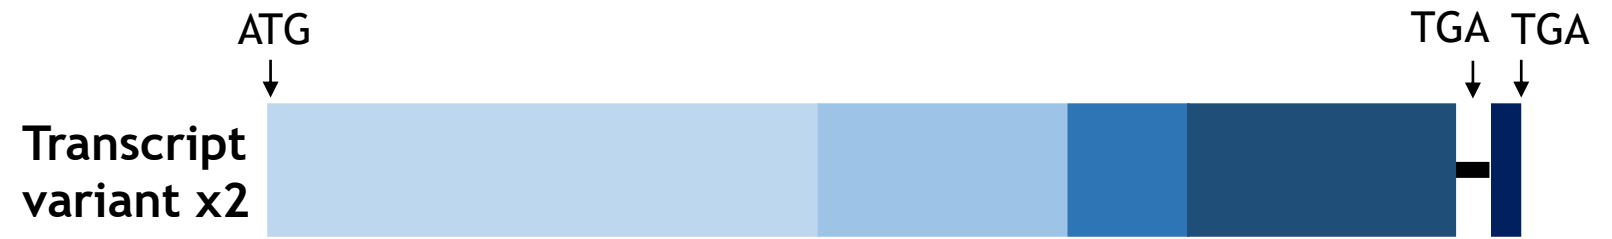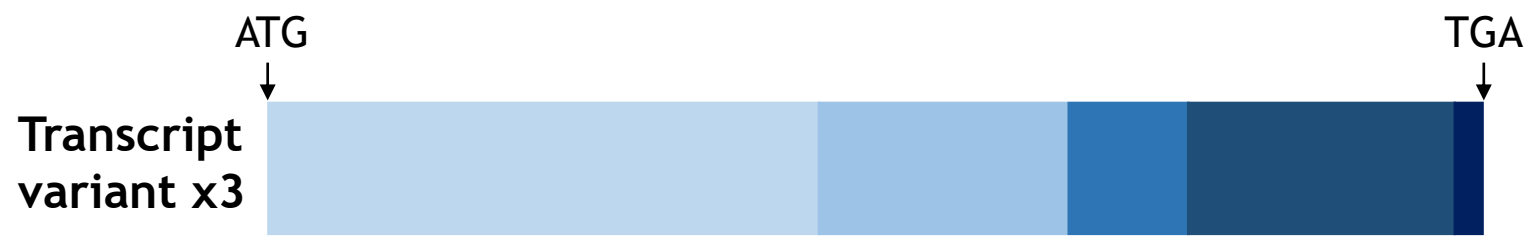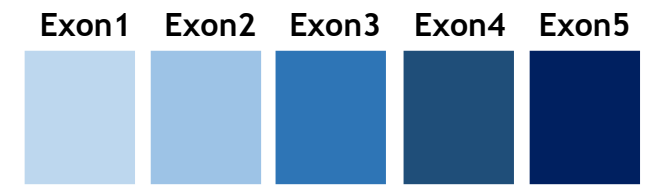

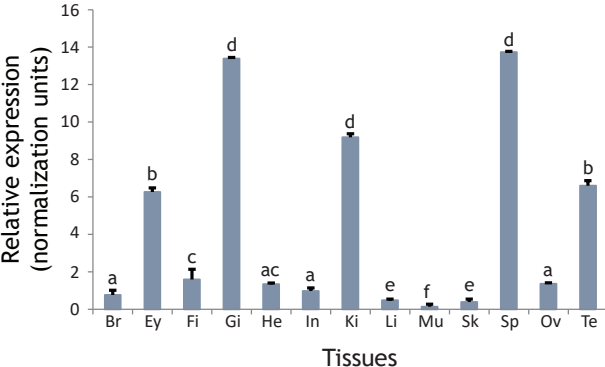

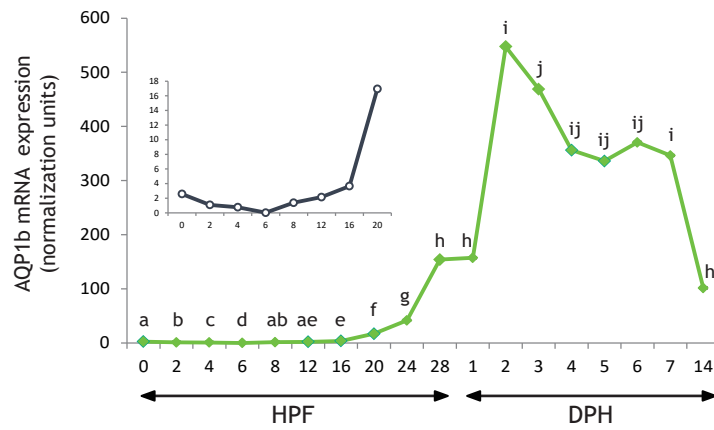



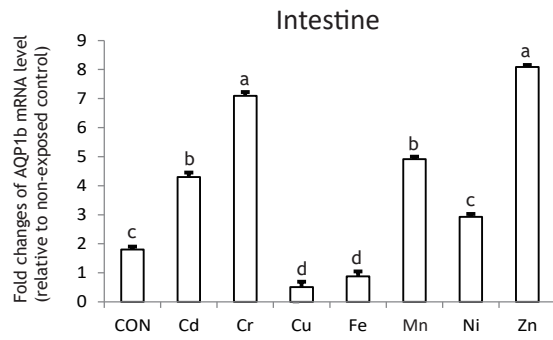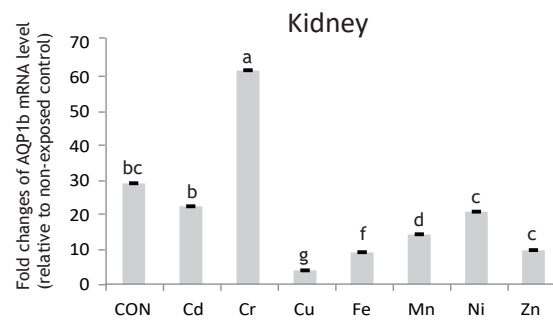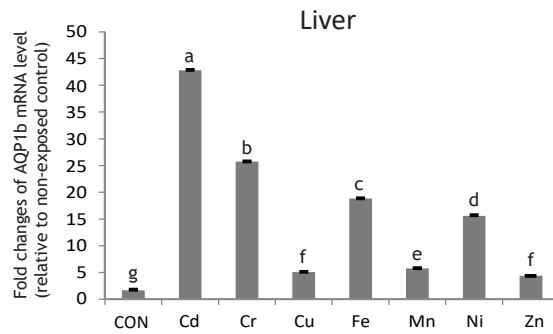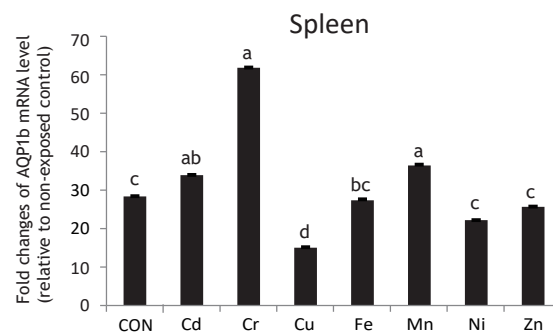

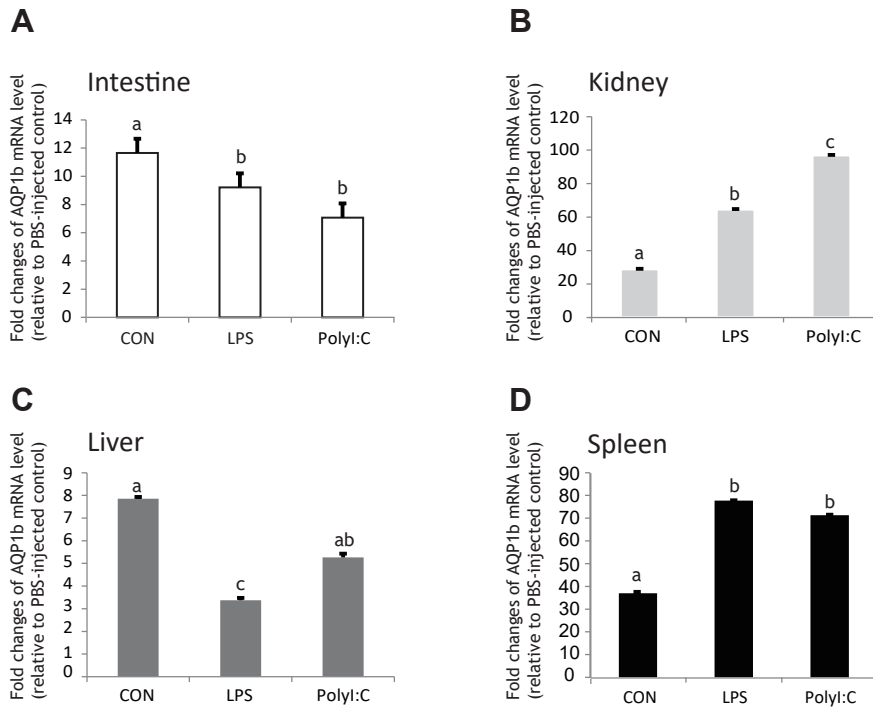

Source: http://biorxiv.org/content/10.1101/2021.09.09.459705v1.full.pdf
